# Supplementary material for: Size-dependent optical extinction of MoS2 nanosheets and their aptamer-induced dispersion behavior for the label-free detection of Escherichia coli O157:H7
Source: Royal Society of Chemistry journal article supplement (doi:10.1039/d1an00212k), 2021-01-01

Electronic Supplementary Material (ESI) for Analyst.  
This journal is © The Royal Society of Chemistry 2021

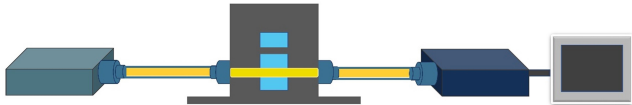

Supplement: d1an00212k4.pdf [file d1an00212k4.pdf]
