# Supplementary figures and images for: Size-dependent optical extinction of MoS2 nanosheets and their aptamer-induced dispersion behavior for the label-free detection of Escherichia coli O157:H7
Source: Royal Society of Chemistry journal article supplement (doi:10.1039/d1an00212k), 2021-01-01

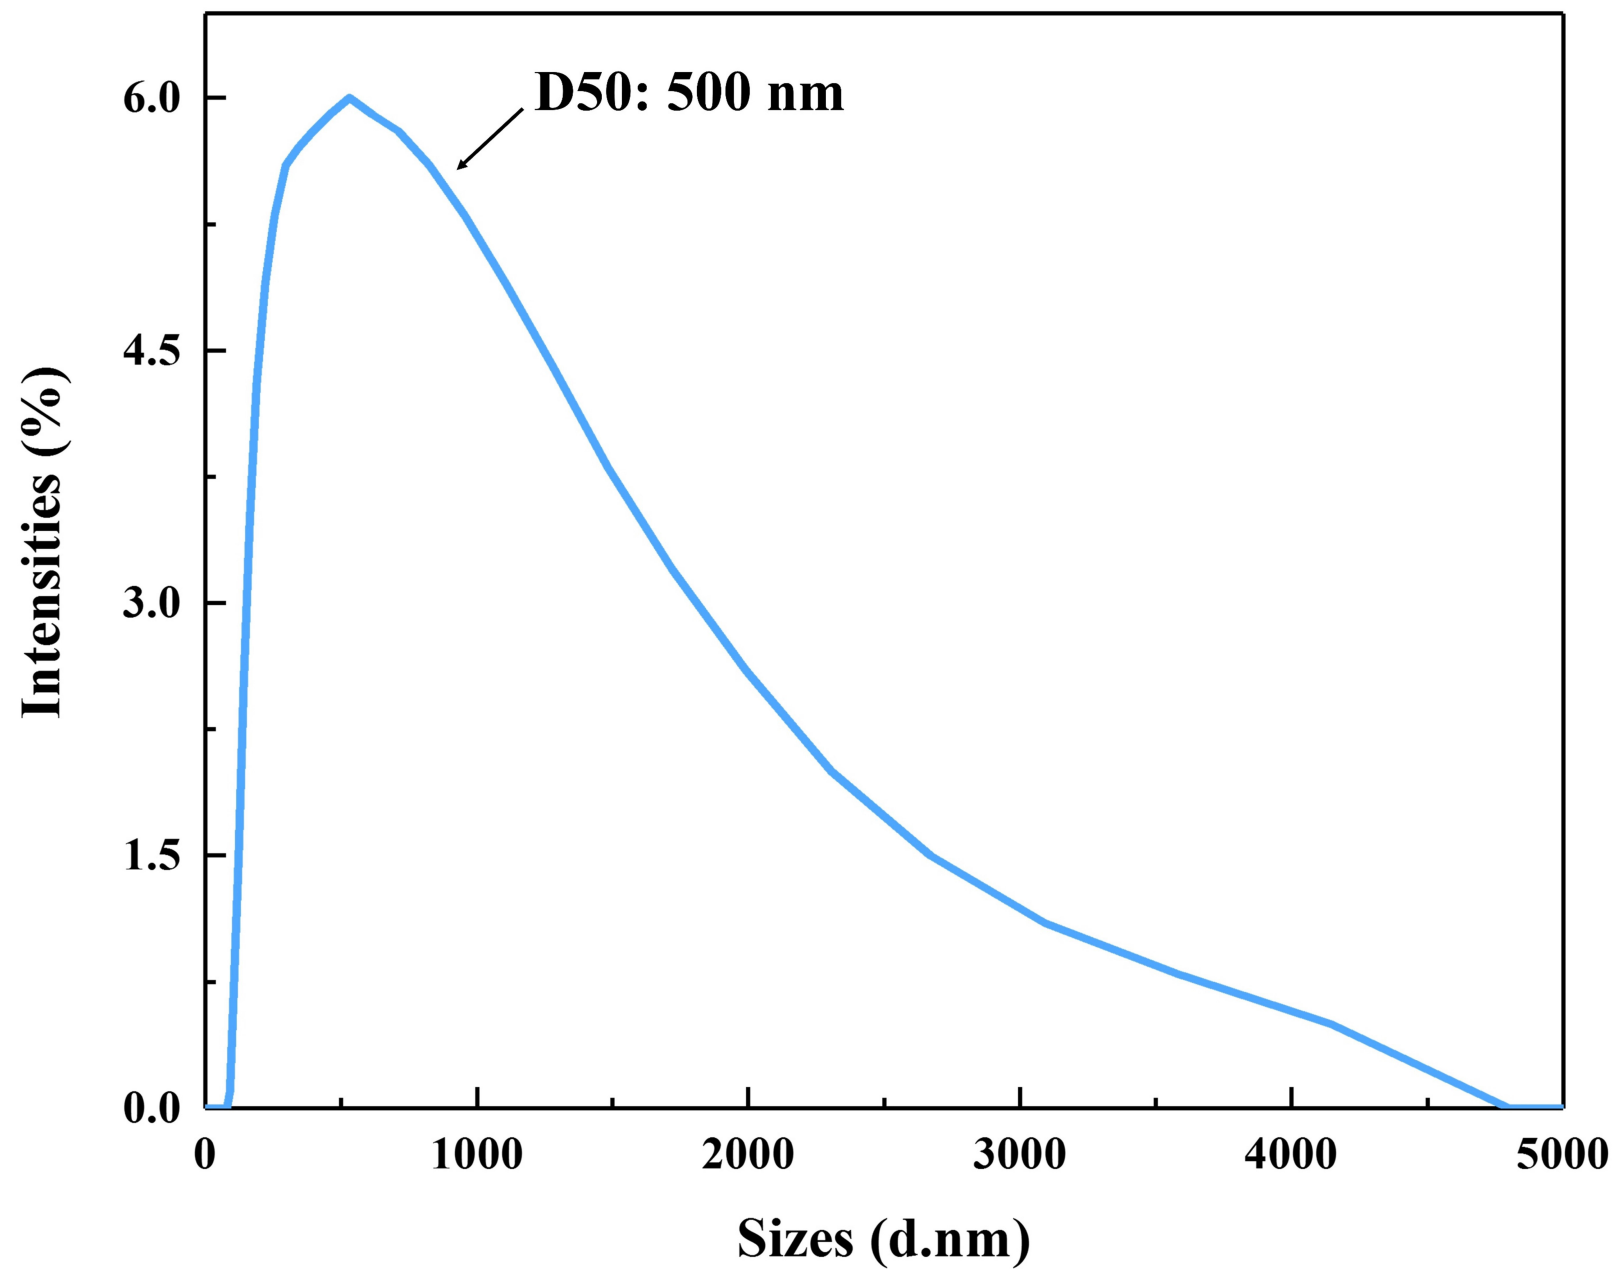

Supplement: d1an00212k10.pdf [file d1an00212k10.pdf]

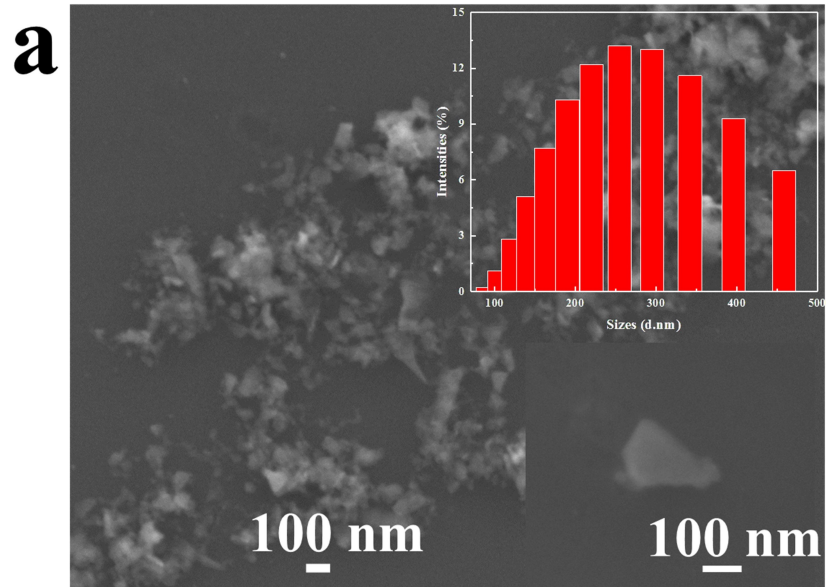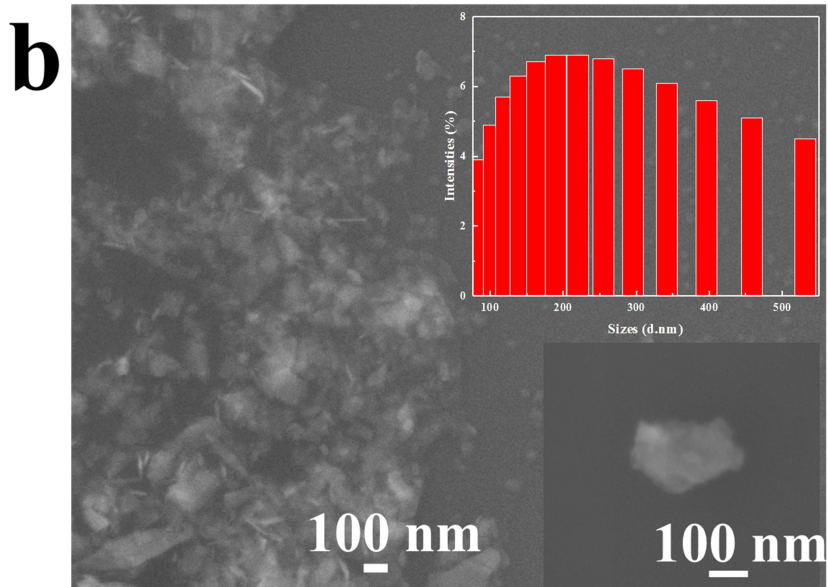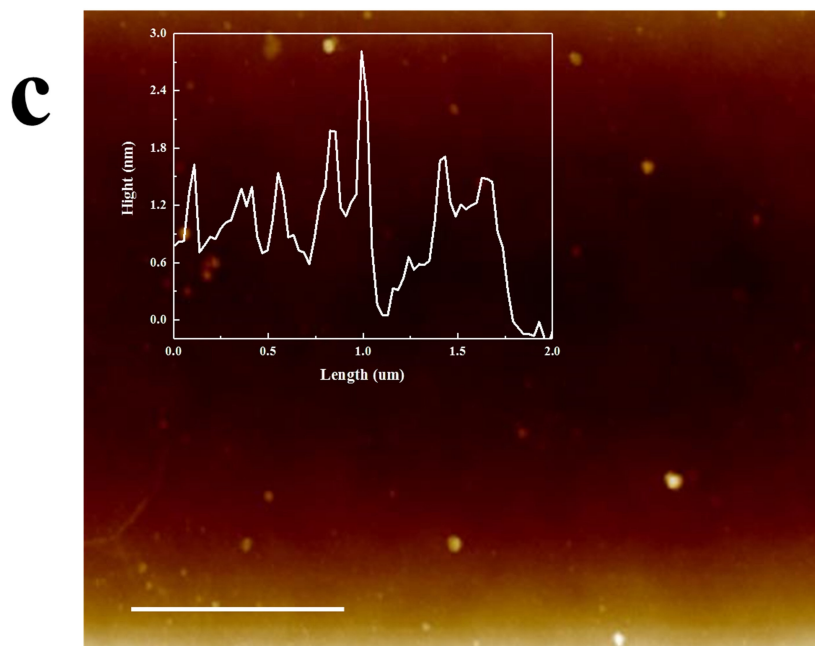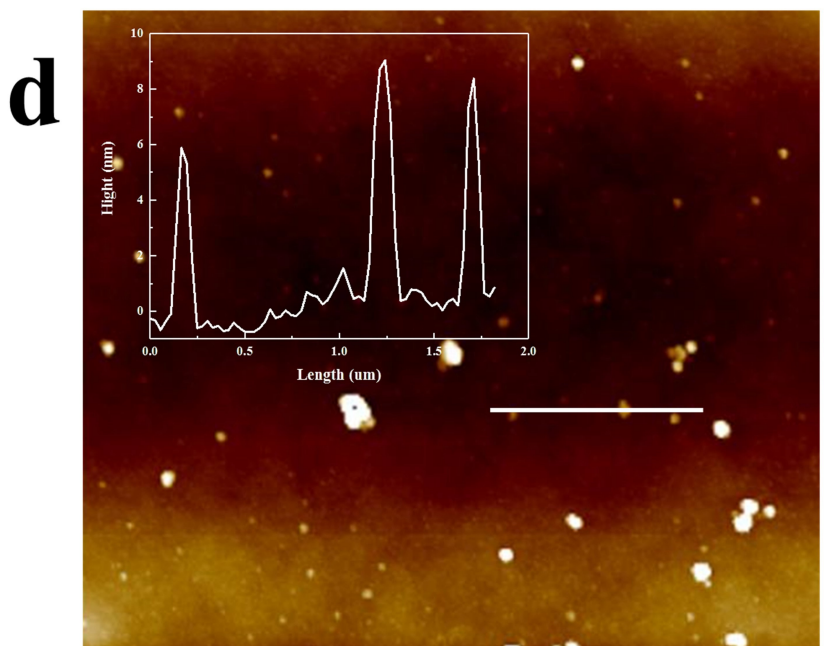

Supplement: d1an00212k3.pdf [file d1an00212k3.pdf]

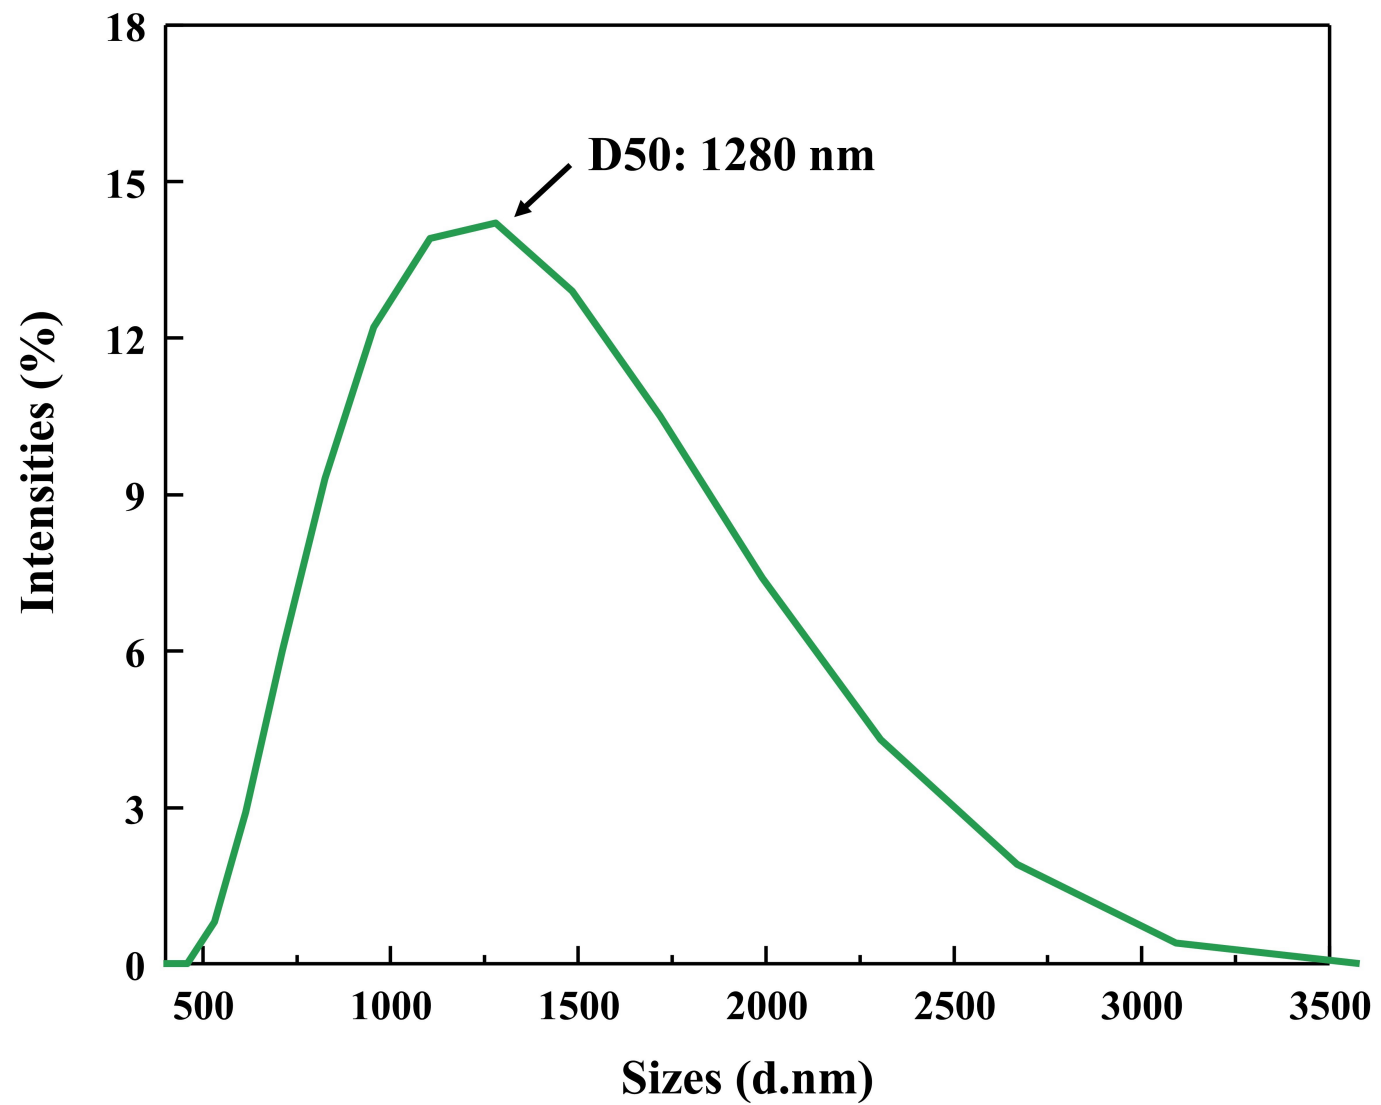

Supplement: d1an00212k8.pdf [file d1an00212k8.pdf]
